# Supplementary material for: Extraordinary selection on the human X chromosome associated with archaic admixture
Source: PubMed Central journal article supplement — Cell Genom. 2023 Feb 28;3(3):100274. doi: 10.1016/j.xgen.2023.100274 (PMC10025451; doi:10.1016/j.xgen.2023.100274), 2023-02-28
Supplement: mmc1.pdf [file mmc1.pdf]

**Cell Genomics, Volume 3**

**Supplemental information**

**Extraordinary selection on the human X chromosome  
associated with archaic admixture**

**Laurits Skov, Moisés Coll Macià, Elise Anne Lucotte, Maria Izabel Alvez Cavassim, David Castellano, Mikkel Heide Schierup, and Kasper Munch**

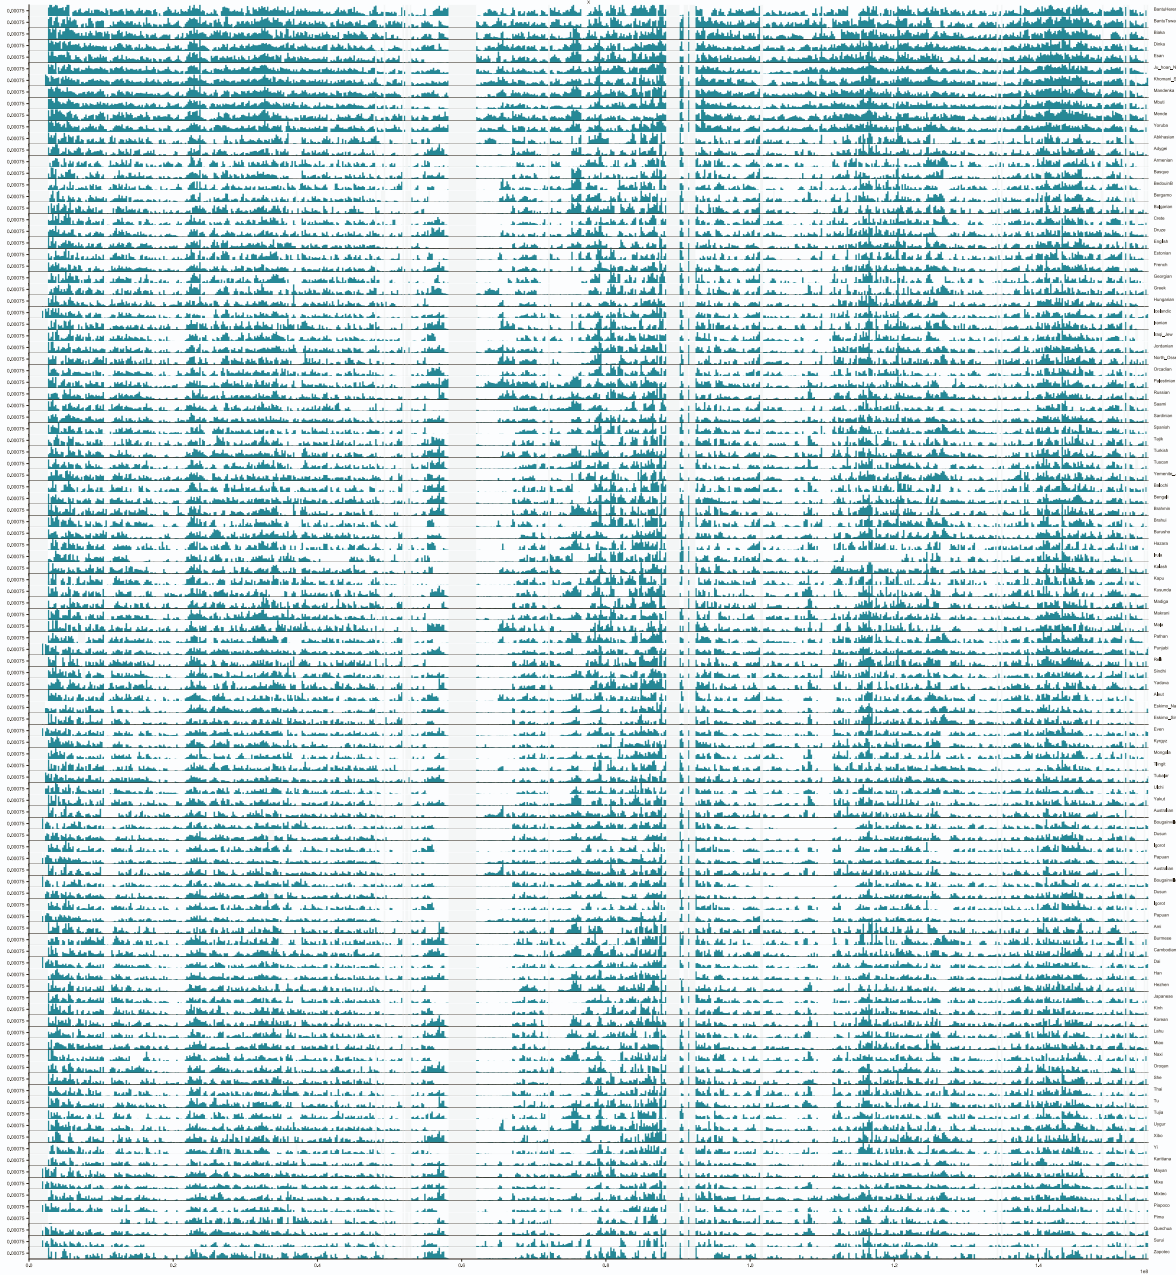

**Figure S1: Mean pairwise differences in 200kb windows across chromosome X for each population (related to Figure 1).** We discarded constituent 100kb windows with fewer than 50,000 called positions (50%) and considered these windows missing data. For a better visual comparison, the y-axis is truncated at 0.0015 to remove outliers. Light grey regions represent missing data.

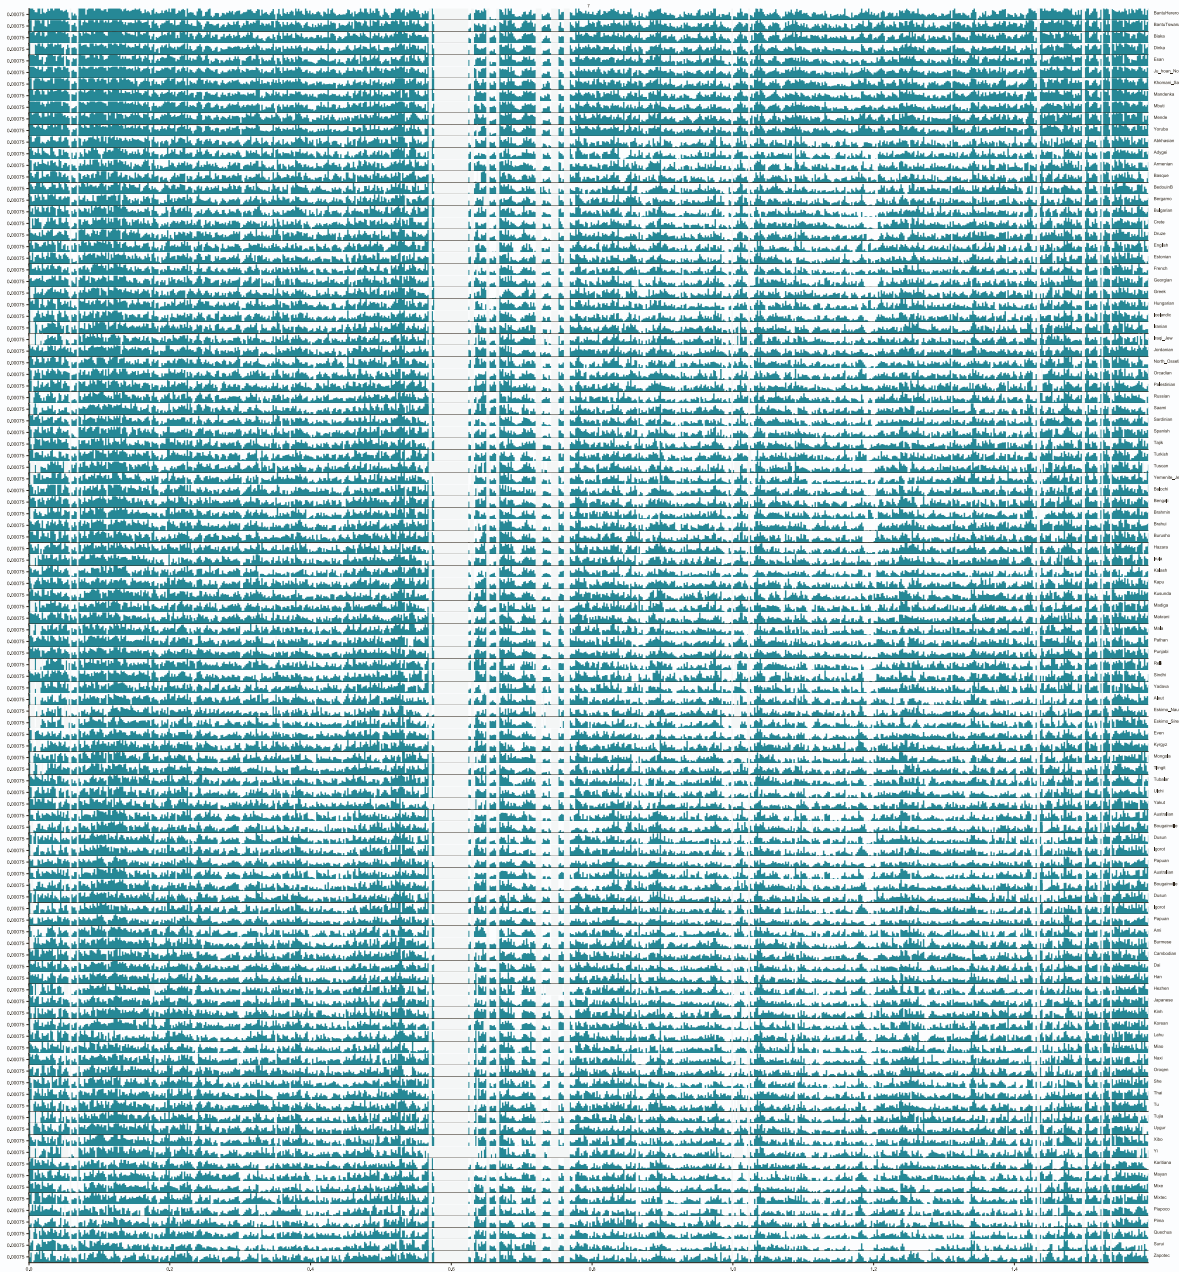

**Figure S2: Mean pairwise differences in 100kb windows across chromosome 7 for each population (related to Figure 1).** We discarded constituent 100kb windows with fewer than 50,000 called positions (50%) and considered these windows missing data. For a better visual comparison, the y-axis is truncated at 0.0015 to remove outliers. Grey regions represent missing data.

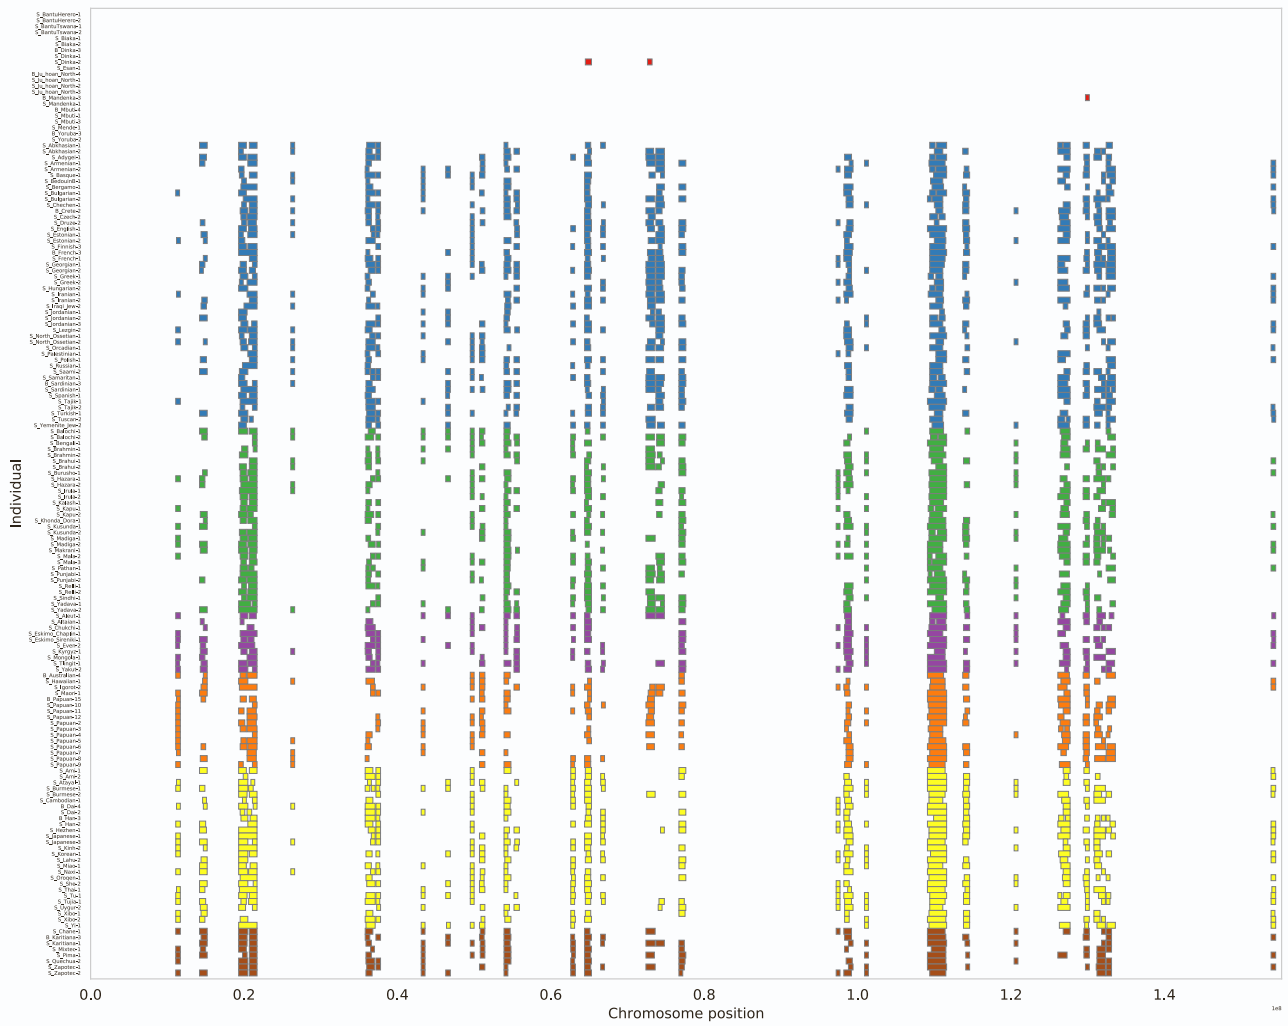

**Figure S3: ECH inference using a clique size of 20% (related to Figure 2).** ECHs identified on each male X chromosome using 20% as the minimum number of individuals included in the haplotype clades defining an ECH.

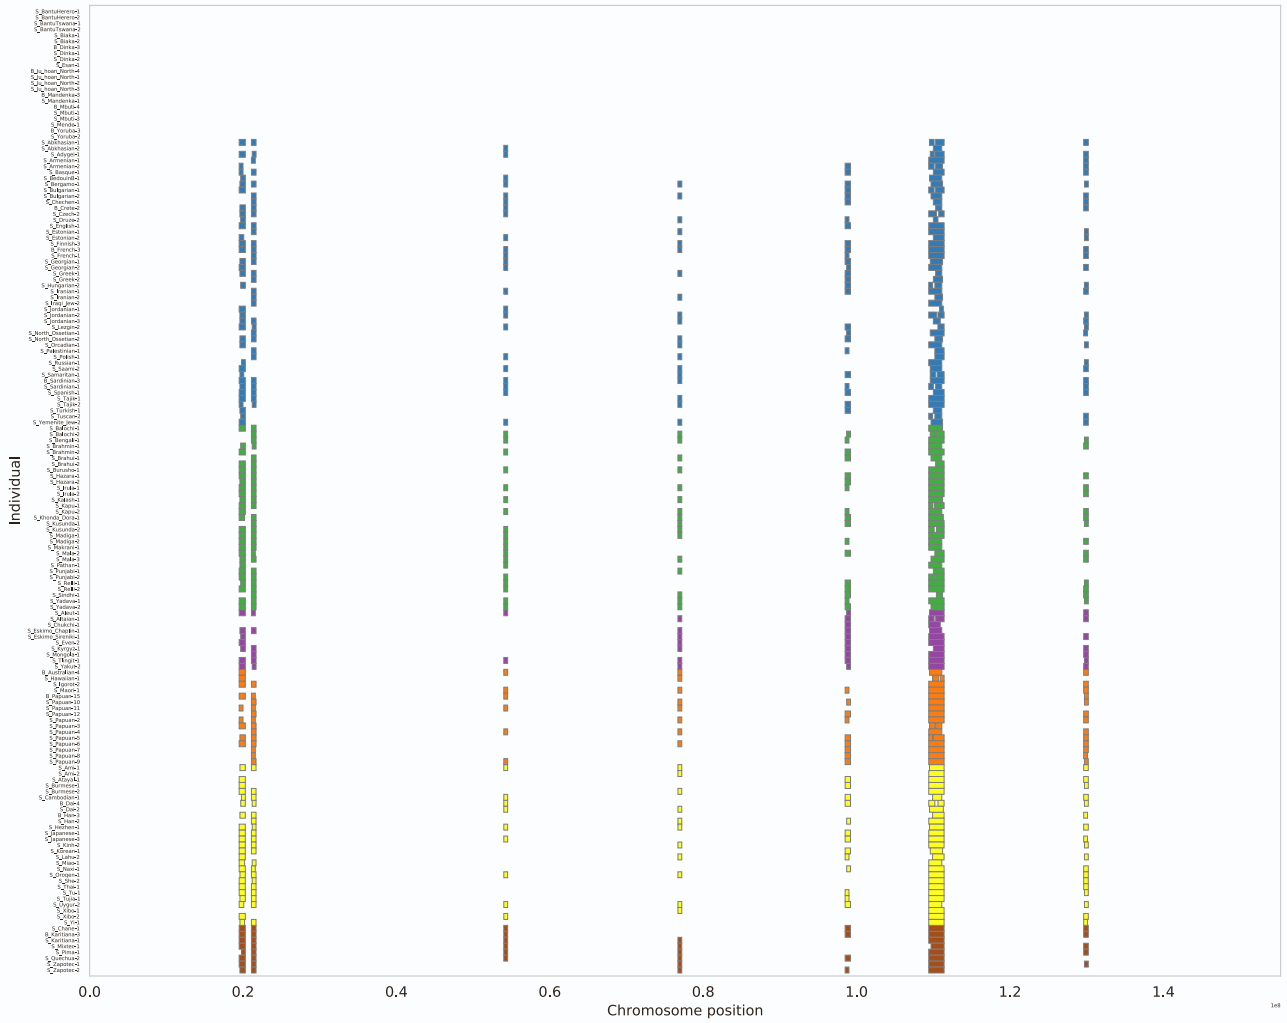

**Figure S4: ECH inference using a clique size of 30% (related to Figure 2).** ECHs identified on each male X chromosome using 30% as the minimum number of individuals included in the haplotype clades defining an ECH.

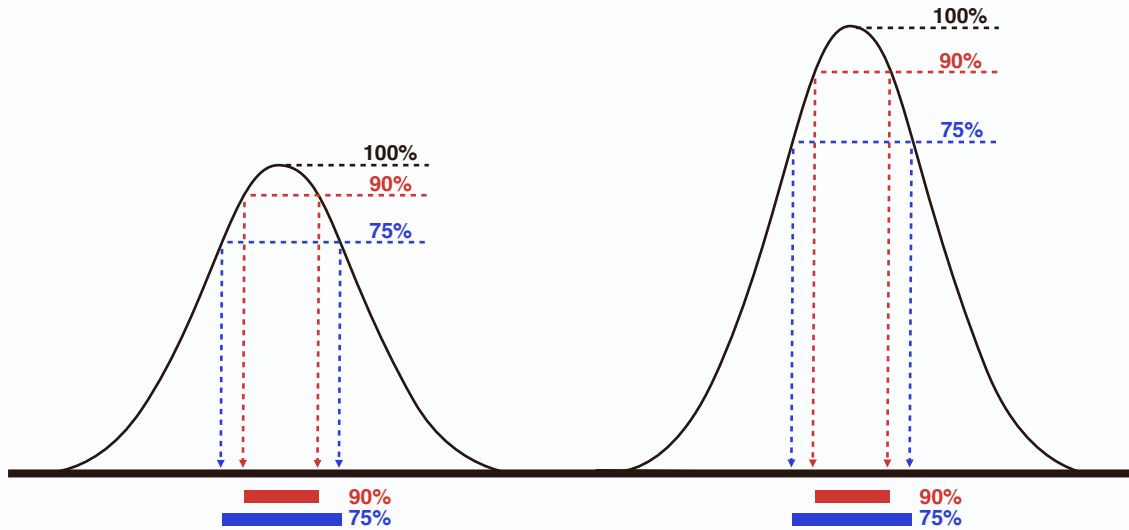

**Figure S5: Core region of an ECH (related to Figure 4 and STAR methods).** We operationally define a region around each peak where the proportion of individuals called as ECH is at least 90% of the peak value. Similarly, we define a wide region where the proportion of individuals called as ECH is above 75% of the peak value.

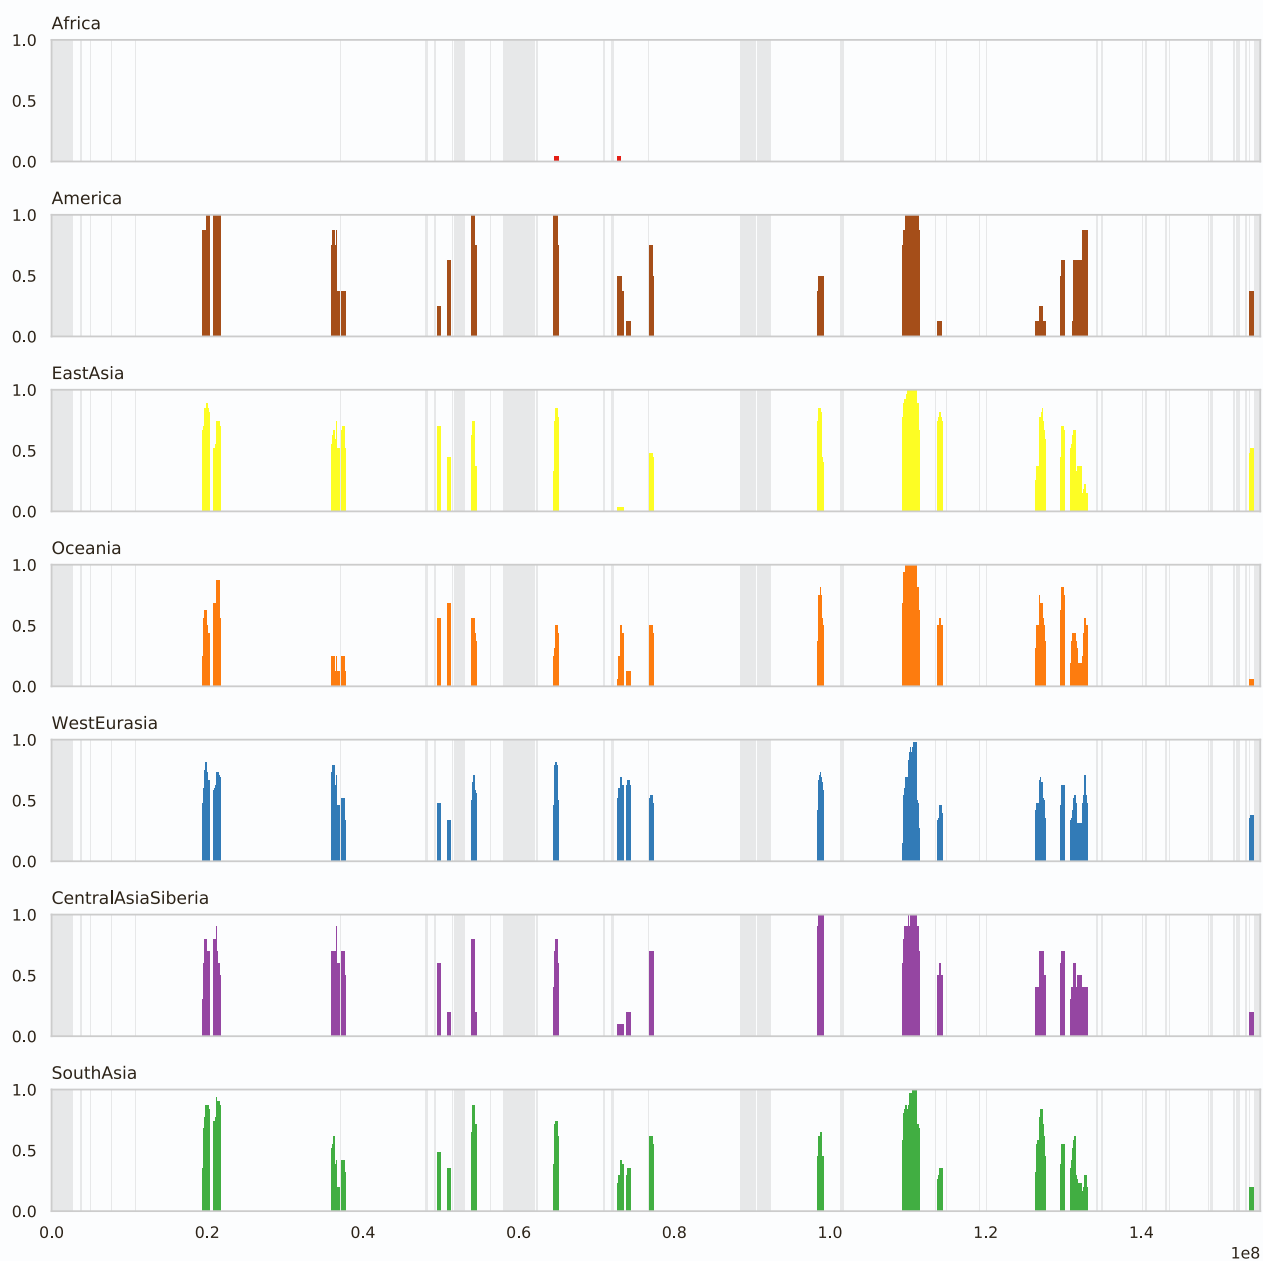

**Figure S6: ECH frequencies by major geographical region (related to Figure 4).** Proportion of individuals from each geographical region called as ECH in each 100kb window. Shaded regions represent regions with missing data.

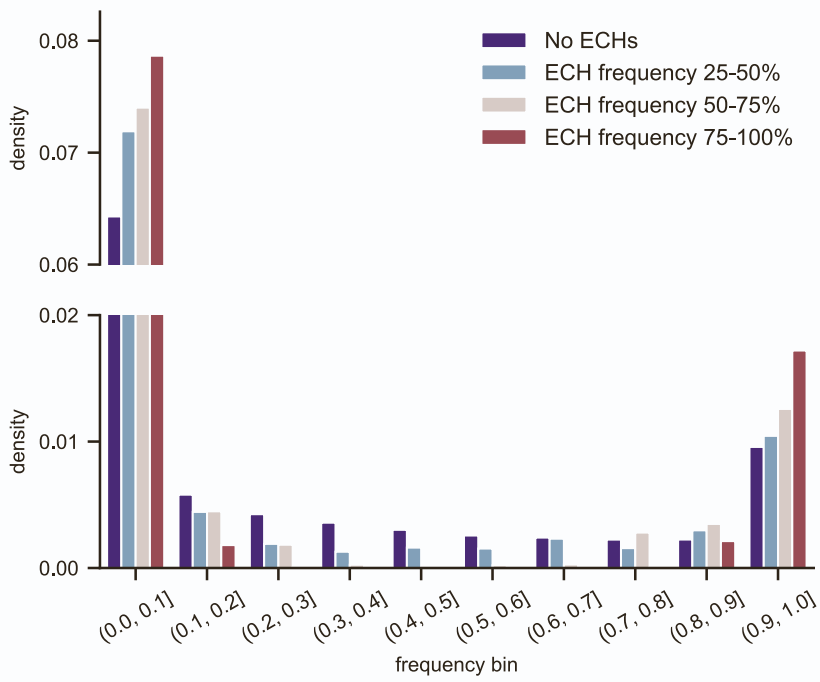

**Figure S7 Site frequency spectrum by ECH frequency (related to Figure 2 and STAR methods):** Unfolded site frequency spectrum in four bins of ECH frequency. The y-axis is cut to accommodate a large number of rare variants.



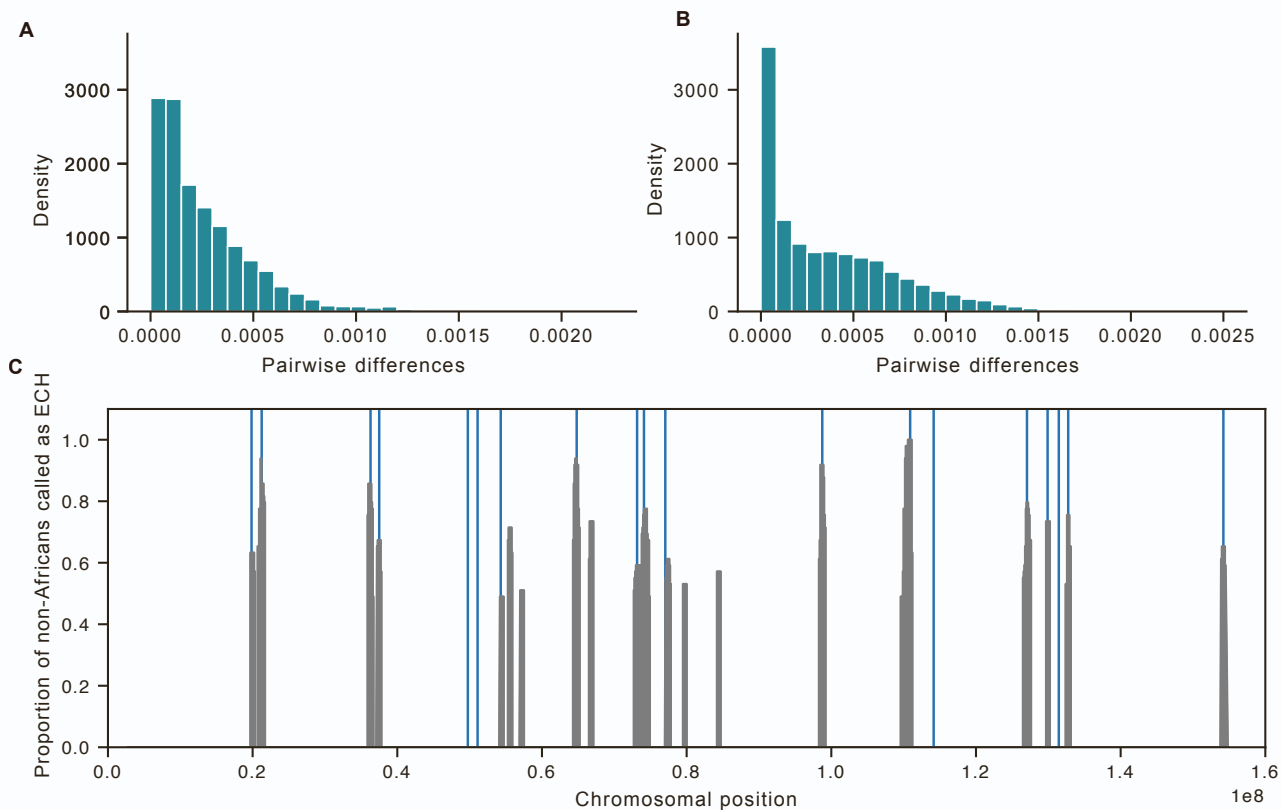

**Figure S8: ECH inference in the CEU population (related to Figure 6 and STAR methods).** (A) Distribution of mean pairwise differences in 200kb windows in neutral simulations of 49 CEU X chromosomes. (B) Distribution of mean pairwise differences in 200kb windows among the 49 male CEU samples analyzed. (C) Frequency of ECHs along the X chromosome in the CEU population. Gray peaks show the proportion of 49 male haplotypes called as ECH in each 100kb window across the X chromosome. Vertical blue lines show the center of the corresponding peaks identified in the SGDP analysis.

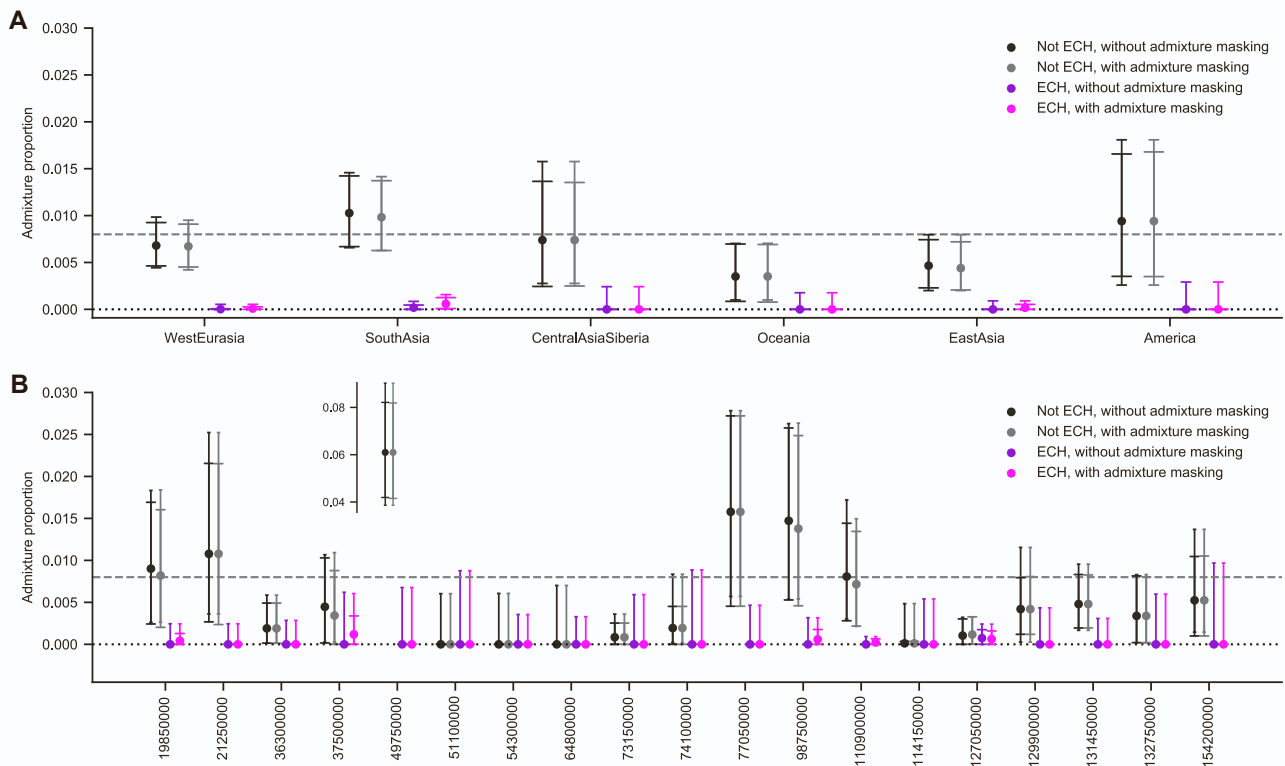

**Figure S9: Admixture proportions in chromosomal regions of partial sweeps (related to Figure 7).** Mean admixture proportions of ECHs (purple) and in remaining haplotypes (black) are computed separately for each 100kb window. Pink and gray represent inference of ECHs after masking archaic admixture (STAR methods). Error bars with wide caps designate the standard 95% confidence intervals obtained from 10,000 bootstrapping iterations. Error bars with narrow caps designate Jeffrey's binomial confidence interval, which better represents confidence when frequencies are zero or very low (in computing this interval, we assume that the sample size equals the number of 100kb sequence windows, STAR methods). The dotted line represents zero admixture. The dashed line shows the mean admixture proportion on the X chromosome. (A) Mean admixture proportions of haplotypes from each geographical region. (B) Admixture proportions at each individual ECH. X-axis labels represent chromosomal positions where each ECH has the highest frequency (peaks in Figure 4). For legibility, one outlier is shown separately.

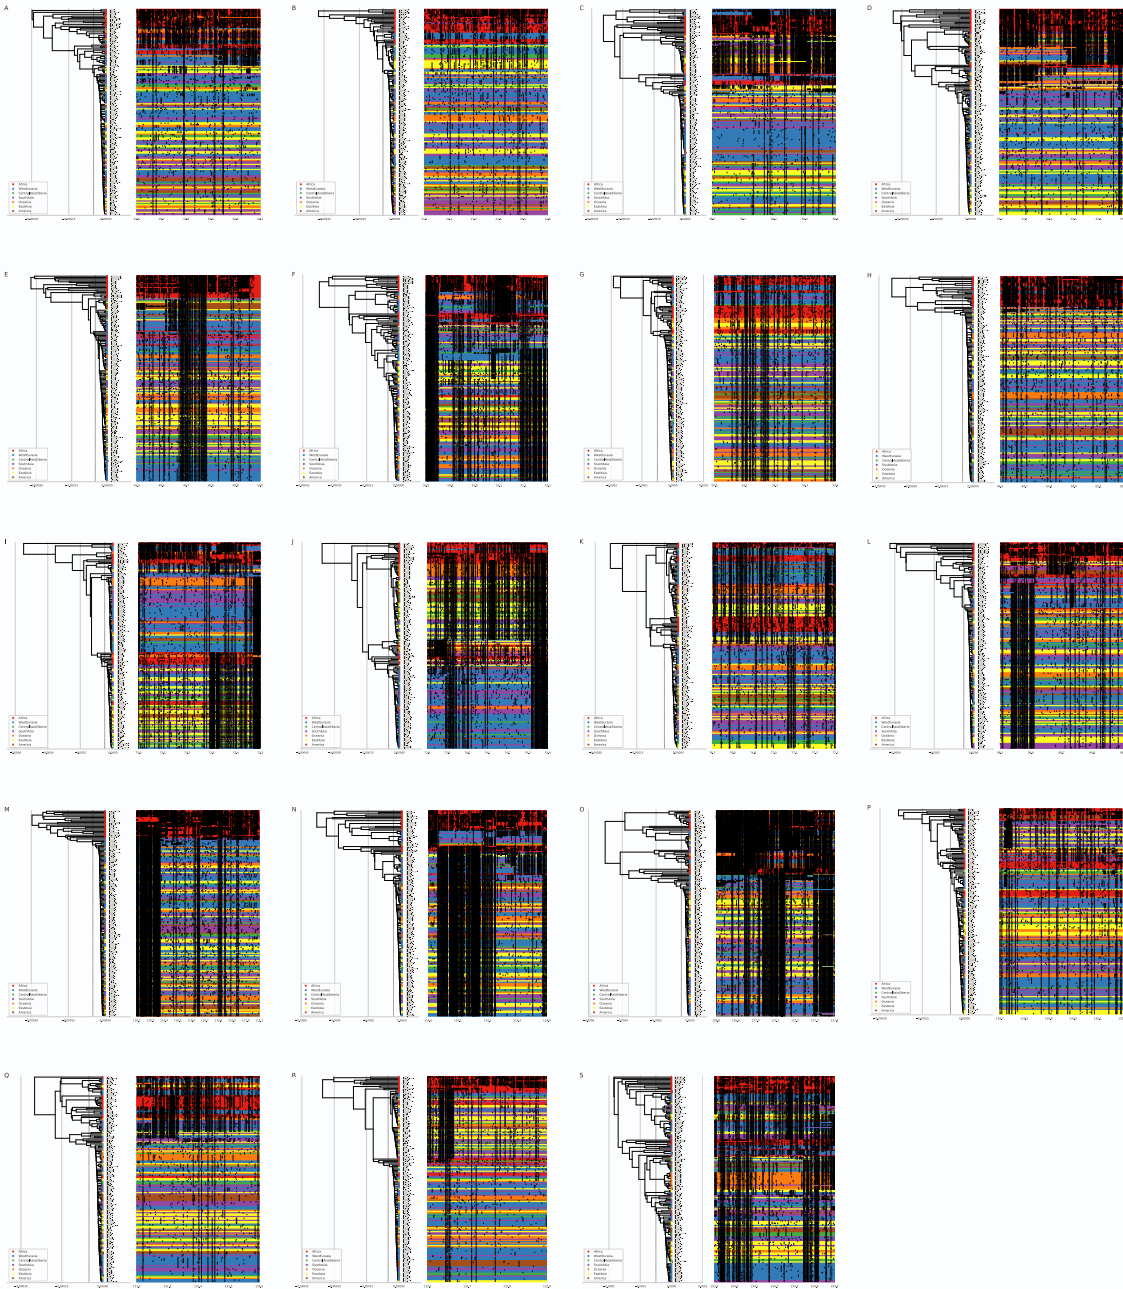

**Figure S10: Haplotype visualizations of all ECHs (related to Figure 3 and Table S2).** The callout label of each sub-figure refers to the Data S1 columns of table S1. The left side of each sub-figure is a UPGMA tree with the x-axis representing Jukes-Cantor corrected sequence distances between male haplotypes. The individual haplotypes are shown as horizontal lines on the right with the x-axis in hg19 megabase coordinates. Haplotypes are color-coded according to geographical region. The ancient Ust'-Ishim individual is marked with grey. Vertical black bars on each haplotype represents non-reference SNPs

| Peak region where frequency is maximal |      |           | "90%-region" where frequency is at least 90% of its value in the peak region (see Figure S5) |      |        |                            |                                       | "75%-region" where frequency is at least 75% of its value in the peak region (see Figure S5) |      |        |                            |                                       | Data S1 Subplot label | Ust'-Ishim male shares ECH (✓/÷) |
|----------------------------------------|------|-----------|----------------------------------------------------------------------------------------------|------|--------|----------------------------|---------------------------------------|----------------------------------------------------------------------------------------------|------|--------|----------------------------|---------------------------------------|-----------------------|----------------------------------|
| Start                                  | End  | Frequency | Start                                                                                        | End  | Length | Lowest frequency in region | Frequency of ECHs spanning the region | Start                                                                                        | End  | Length | Lowest frequency in region | Frequency of ECHs spanning the region |                       |                                  |
| 198                                    | 199  | 0,83      | 196                                                                                          | 201  | 5      | 0,77                       | 0,71                                  | 195                                                                                          | 203  | 8      | 0,65                       | 0,54                                  | A                     | ÷                                |
| 212                                    | 213  | 0,81      | 211                                                                                          | 216  | 5      | 0,79                       | 0,74                                  | 207                                                                                          | 217  | 10     | 0,62                       | 0,52                                  | B                     | ✓                                |
| 362                                    | 364  | 0,66      | 360                                                                                          | 364  | 4      | 0,64                       | 0,64                                  | 359                                                                                          | 367  | 8      | 0,51                       | 0,31                                  | C                     | ✓                                |
| 373                                    | 377  | 0,51      | 372                                                                                          | 377  | 5      | 0,5                        | 0,5                                   | 372                                                                                          | 377  | 5      | 0,5                        | 0,5                                   | D                     | ÷                                |
| 495                                    | 500  | 0,53      | 495                                                                                          | 500  | 5      | 0,53                       | 0,53                                  | 495                                                                                          | 500  | 5      | 0,53                       | 0,53                                  | E                     | ÷                                |
| 508                                    | 514  | 0,34      | 508                                                                                          | 513  | 5      | 0,41                       | 0,41                                  | 508                                                                                          | 513  | 5      | 0,41                       | 0,41                                  | F                     | ✓                                |
| 542                                    | 544  | 0,76      | 540                                                                                          | 544  | 4      | 0,74                       | 0,74                                  | 539                                                                                          | 544  | 5      | 0,61                       | 0,61                                  | G                     | ÷                                |
| 647                                    | 649  | 0,78      | 646                                                                                          | 651  | 5      | 0,71                       | 0,68                                  | 645                                                                                          | 652  | 7      | 0,59                       | 0,49                                  | H                     | ✓                                |
| 730                                    | 733  | 0,43      | 730                                                                                          | 735  | 5      | 0,39                       | 0,39                                  | 728                                                                                          | 735  | 7      | 0,34                       | 0,3                                   | I                     | ✓                                |
| 739                                    | 743  | 0,34      | 738                                                                                          | 744  | 6      | 0,31                       | 0,3                                   | 738                                                                                          | 744  | 6      | 0,31                       | 0,3                                   | J                     | ✓                                |
| 769                                    | 772  | 0,56      | 767                                                                                          | 773  | 6      | 0,55                       | 0,54                                  | 767                                                                                          | 774  | 7      | 0,5                        | 0,49                                  | K                     | ✓                                |
| 987                                    | 988  | 0,75      | 985                                                                                          | 989  | 4      | 0,71                       | 0,69                                  | 985                                                                                          | 991  | 6      | 0,57                       | 0,54                                  | L                     | ✓                                |
| 1107                                   | 1111 | 0,99      | 1102                                                                                         | 1111 | 9      | 0,95                       | 0,91                                  | 1094                                                                                         | 1112 | 18     | 0,75                       | 0,53                                  | M                     | ✓                                |
| 1140                                   | 1143 | 0,51      | 1140                                                                                         | 1144 | 4      | 0,49                       | 0,49                                  | 1138                                                                                         | 1145 | 7      | 0,41                       | 0,36                                  | N                     | ✓                                |
| 1270                                   | 1271 | 0,71      | 1268                                                                                         | 1274 | 6      | 0,65                       | 0,57                                  | 1268                                                                                         | 1275 | 7      | 0,6                        | 0,49                                  | O                     | ✓                                |
| 1297                                   | 1301 | 0,65      | 1297                                                                                         | 1302 | 5      | 0,64                       | 0,64                                  | 1297                                                                                         | 1302 | 5      | 0,64                       | 0,64                                  | P                     | ✓                                |
| 1313                                   | 1316 | 0,58      | 1312                                                                                         | 1316 | 4      | 0,56                       | 0,56                                  | 1311                                                                                         | 1316 | 5      | 0,46                       | 0,46                                  | Q                     | ÷                                |
| 1326                                   | 1329 | 0,49      | 1326                                                                                         | 1329 | 3      | 0,49                       | 0,49                                  | 1325                                                                                         | 1331 | 6      | 0,37                       | 0,27                                  | R                     | ÷                                |
| 1540                                   | 1544 | 0,31      | 1539                                                                                         | 1545 | 6      | 0,29                       | 0,27                                  | 1539                                                                                         | 1545 | 6      | 0,29                       | 0,27                                  | S                     | ÷                                |

**Table S1: Coordinates and frequencies of ECHs (related to Figure 4).** All coordinates are listed in 100kb units of the hg19 reference.

| Geographical region | Fragment type                         | Fraction of region Introgressed (%)                         |                                                           |          |
|---------------------|---------------------------------------|-------------------------------------------------------------|-----------------------------------------------------------|----------|
|                     |                                       | X chromosome<br>(with autosomal parameters<br>for decoding) | X chromosome<br>(with haploid parameters for<br>decoding) | Autosome |
| America             | total                                 | 0,144                                                       | 0,49                                                      | 2,1      |
|                     | Denisova/Altai/Vindija                | 0,122                                                       | 0,237                                                     | 1,676    |
|                     | Altai                                 | 0,011                                                       | 0,024                                                     | 0,233    |
|                     | Vindija                               | 0,082                                                       | 0,109                                                     | 0,961    |
|                     | Denisova                              | 0,029                                                       | 0,027                                                     | 0,135    |
|                     | Ambiguous                             | 0                                                           | 0,078                                                     | 0,348    |
|                     | Sankararaman et al. 2016 <sup>9</sup> | 0,26                                                        | 0,26                                                      | 1,42     |
|                     |                                       |                                                             |                                                           |          |
| CentralAsiaSiberia  | total                                 | 0,178                                                       | 0,417                                                     | 2,264    |
|                     | Denisova/Altai/Vindija                | 0,125                                                       | 0,144                                                     | 1,84     |
|                     | Altai                                 | 0,021                                                       | 0,056                                                     | 0,229    |
|                     | Vindija                               | 0,032                                                       | 0,027                                                     | 1,083    |
|                     | Denisova                              | 0,021                                                       | 0,006                                                     | 0,15     |
|                     | Ambiguous                             | 0,051                                                       | 0,055                                                     | 0,378    |
|                     | Sankararaman et al. 2016 <sup>9</sup> | 0,23                                                        | 0,23                                                      | 1,45     |
|                     |                                       |                                                             |                                                           |          |
| EastAsia            | total                                 | 0,288                                                       | 0,709                                                     | 2,292    |
|                     | Denisova/Altai/Vindija                | 0,211                                                       | 0,36                                                      | 1,873    |
|                     | Altai                                 | 0,014                                                       | 0,058                                                     | 0,246    |
|                     | Vindija                               | 0,151                                                       | 0,211                                                     | 1,097    |
|                     | Denisova                              | 0,009                                                       | 0,009                                                     | 0,168    |
|                     | Ambiguous                             | 0,036                                                       | 0,083                                                     | 0,363    |
|                     | Sankararaman et al. 2016 <sup>9</sup> | 0,32                                                        | 0,32                                                      | 1,45     |
|                     |                                       |                                                             |                                                           |          |
| Oceania             | total                                 | 0,515                                                       | 1,189                                                     | 3,745    |
|                     | Denisova/Altai/Vindija                | 0,414                                                       | 0,745                                                     | 3,342    |
|                     | Altai                                 | 0,004                                                       | 0,056                                                     | 0,289    |
|                     | Vindija                               | 0,26                                                        | 0,282                                                     | 1,132    |
|                     | Denisova                              | 0,11                                                        | 0,229                                                     | 1,501    |
|                     | Ambiguous                             | 0,04                                                        | 0,178                                                     | 0,42     |
|                     | Sankararaman et al. 2016 <sup>9</sup> | 0,6                                                         | 0,6                                                       | 2,39     |
|                     |                                       |                                                             |                                                           |          |
| SouthAsia           | total                                 | 0,273                                                       | 0,71                                                      | 2,081    |
|                     | Denisova/Altai/Vindija                | 0,222                                                       | 0,405                                                     | 1,658    |
|                     | Altai                                 | 0,017                                                       | 0,048                                                     | 0,226    |
|                     | Vindija                               | 0,152                                                       | 0,228                                                     | 0,881    |
|                     | Denisova                              | 0,014                                                       | 0,026                                                     | 0,179    |
|                     | Ambiguous                             | 0,039                                                       | 0,103                                                     | 0,371    |
|                     | Sankararaman et al. 2016 <sup>9</sup> | 0,41                                                        | 0,41                                                      | 1,25     |
|                     |                                       |                                                             |                                                           |          |
| WestEurasia         | total                                 | 0,222                                                       | 0,527                                                     | 1,822    |
|                     | Denisova/Altai/Vindija                | 0,139                                                       | 0,202                                                     | 1,406    |
|                     | Altai                                 | 0,014                                                       | 0,04                                                      | 0,214    |
|                     | Vindija                               | 0,069                                                       | 0,097                                                     | 0,772    |
|                     | Denisova                              | 0,007                                                       | 0,009                                                     | 0,088    |
|                     | Ambiguous                             | 0,048                                                       | 0,056                                                     | 0,332    |
|                     | Sankararaman et al. 2016 <sup>9</sup> | 0,18                                                        | 0,18                                                      | 1,08     |
|                     |                                       |                                                             |                                                           |          |

**Table S2: Summary of archaic admixture inference (related to Figure 7)**

| Sample ID           | Population      | Region             | Sample ID          | Population     | Region      |
|---------------------|-----------------|--------------------|--------------------|----------------|-------------|
| S_BantuHerero-1     | BantuHerero     | Africa             | S_Papuan-12        | Papuan         | Oceania     |
| S_BantuHerero-2     | BantuHerero     | Africa             | S_Papuan-2         | Papuan         | Oceania     |
| S_BantuTswana-1     | BantuTswana     | Africa             | S_Papuan-3         | Papuan         | Oceania     |
| S_BantuTswana-2     | BantuTswana     | Africa             | S_Papuan-4         | Papuan         | Oceania     |
| S_Biaka-1           | Biaka           | Africa             | S_Papuan-5         | Papuan         | Oceania     |
| S_Biaka-2           | Biaka           | Africa             | S_Papuan-6         | Papuan         | Oceania     |
| B_Dinka-3           | Dinka           | Africa             | S_Papuan-7         | Papuan         | Oceania     |
| S_Dinka-1           | Dinka           | Africa             | S_Papuan-8         | Papuan         | Oceania     |
| S_Dinka-2           | Dinka           | Africa             | S_Papuan-9         | Papuan         | Oceania     |
| S_Esan-1            | Esan            | Africa             | S_Balochi-1        | Balochi        | SouthAsia   |
| B_Ju_hoan_North-4   | Ju_hoan_North   | Africa             | S_Balochi-2        | Balochi        | SouthAsia   |
| S_Ju_hoan_North-1   | Ju_hoan_North   | Africa             | S_Bengali-1        | Bengali        | SouthAsia   |
| S_Ju_hoan_North-2   | Ju_hoan_North   | Africa             | S_Brahmin-1        | Brahmin        | SouthAsia   |
| S_Ju_hoan_North-3   | Ju_hoan_North   | Africa             | S_Brahmin-2        | Brahmin        | SouthAsia   |
| B_Mandenka-3        | Mandenka        | Africa             | S_Brahui-1         | Brahui         | SouthAsia   |
| S_Mandenka-1        | Mandenka        | Africa             | S_Brahui-2         | Brahui         | SouthAsia   |
| B_Mbuti-4           | Mbuti           | Africa             | S_Burusho-1        | Burusho        | SouthAsia   |
| S_Mbuti-1           | Mbuti           | Africa             | S_Hazara-1         | Hazara         | SouthAsia   |
| S_Mbuti-3           | Mbuti           | Africa             | S_Hazara-2         | Hazara         | SouthAsia   |
| S_Mende-1           | Mende           | Africa             | S_Irula-1          | Irula          | SouthAsia   |
| B_Yoruba-3          | Yoruba          | Africa             | S_Irula-2          | Irula          | SouthAsia   |
| S_Yoruba-2          | Yoruba          | Africa             | S_Kalash-1         | Kalash         | SouthAsia   |
| S_Chane-1           | Chane           | America            | S_Kapu-1           | Kapu           | SouthAsia   |
| B_Karitiana-3       | Karitiana       | America            | S_Kapu-2           | Kapu           | SouthAsia   |
| S_Karitiana-1       | Karitiana       | America            | S_Khonda_Dora-1    | Khonda_Dora    | SouthAsia   |
| S_Mixtec-1          | Mixtec          | America            | S_Kusunda-1        | Kusunda        | SouthAsia   |
| S_Pima-1            | Pima            | America            | S_Kusunda-2        | Kusunda        | SouthAsia   |
| S_Quechua-2         | Quechua         | America            | S_Madiga-1         | Madiga         | SouthAsia   |
| S_Zapotec-1         | Zapotec         | America            | S_Madiga-2         | Madiga         | SouthAsia   |
| S_Zapotec-2         | Zapotec         | America            | S_Makrani-1        | Makrani        | SouthAsia   |
| S_Aleut-1           | Aleut           | CentralAsiaSiberia | S_Mala-2           | Mala           | SouthAsia   |
| S_Altaian-1         | Altaian         | CentralAsiaSiberia | S_Mala-3           | Mala           | SouthAsia   |
| S_Chukchi-1         | Chukchi         | CentralAsiaSiberia | S_Pathan-1         | Pathan         | SouthAsia   |
| S_Eskimo_Chaplin-1  | Eskimo_Chaplin  | CentralAsiaSiberia | S_Punjabi-1        | Punjabi        | SouthAsia   |
| S_Eskimo_Sireniki-1 | Eskimo_Sireniki | CentralAsiaSiberia | S_Punjabi-2        | Punjabi        | SouthAsia   |
| S_Even-2            | Even            | CentralAsiaSiberia | S_Relli-1          | Relli          | SouthAsia   |
| S_Kyrgyz-1          | Kyrgyz          | CentralAsiaSiberia | S_Relli-2          | Relli          | SouthAsia   |
| S_Mongola-1         | Mongola         | CentralAsiaSiberia | S_Sindhi-1         | Sindhi         | SouthAsia   |
| S_Tlingit-1         | Tlingit         | CentralAsiaSiberia | S_Yadava-1         | Yadava         | SouthAsia   |
| S_Yakut-2           | Yakut           | CentralAsiaSiberia | S_Yadava-2         | Yadava         | SouthAsia   |
| S_Ami-1             | Ami             | EastAsia           | S_Abkhasian-1      | Abkhasian      | WestEurasia |
| S_Ami-2             | Ami             | EastAsia           | S_Abkhasian-2      | Abkhasian      | WestEurasia |
| S_Atayal-1          | Atayal          | EastAsia           | S_Adygei-1         | Adygei         | WestEurasia |
| S_Burmese-1         | Burmese         | EastAsia           | S_Armenian-1       | Armenian       | WestEurasia |
| S_Burmese-2         | Burmese         | EastAsia           | S_Armenian-2       | Armenian       | WestEurasia |
| S_Cambodian-1       | Cambodian       | EastAsia           | S_Basque-1         | Basque         | WestEurasia |
| B_Dai-4             | Dai             | EastAsia           | S_BedouinB-1       | BedouinB       | WestEurasia |
| S_Dai-2             | Dai             | EastAsia           | S_Bergamo-1        | Bergamo        | WestEurasia |
| B_Han-3             | Han             | EastAsia           | S_Bulgarian-1      | Bulgarian      | WestEurasia |
| S_Han-2             | Han             | EastAsia           | S_Bulgarian-2      | Bulgarian      | WestEurasia |
| S_Hezhen-1          | Hezhen          | EastAsia           | S_Chechen-1        | Chechen        | WestEurasia |
| S_Japanese-1        | Japanese        | EastAsia           | B_Crete-2          | Crete          | WestEurasia |
| S_Japanese-3        | Japanese        | EastAsia           | S_Czech-2          | Czech          | WestEurasia |
| S_Kinh-2            | Kinh            | EastAsia           | S_Druze-2          | Druze          | WestEurasia |
| S_Korean-1          | Korean          | EastAsia           | S_English-1        | English        | WestEurasia |
| S_Lahu-2            | Lahu            | EastAsia           | S_Estonian-1       | Estonian       | WestEurasia |
| S_Miao-1            | Miao            | EastAsia           | S_Estonian-2       | Estonian       | WestEurasia |
| S_Naxi-1            | Naxi            | EastAsia           | S_Finnish-3        | Finnish        | WestEurasia |
| S_Oroqen-1          | Oroqen          | EastAsia           | B_French-3         | French         | WestEurasia |
| S_She-2             | She             | EastAsia           | S_French-1         | French         | WestEurasia |
| S_Thai-1            | Thai            | EastAsia           | S_Georgian-1       | Georgian       | WestEurasia |
| S_Tu-1              | Tu              | EastAsia           | S_Georgian-2       | Georgian       | WestEurasia |
| S_Tujia-1           | Tujia           | EastAsia           | S_Greek-1          | Greek          | WestEurasia |
| S_Uygur-2           | Uygur           | EastAsia           | S_Greek-2          | Greek          | WestEurasia |
| S_Xibo-1            | Xibo            | EastAsia           | S_Hungarian-2      | Hungarian      | WestEurasia |
| S_Xibo-2            | Xibo            | EastAsia           | S_Iranian-1        | Iranian        | WestEurasia |
| S_Yi-1              | Yi              | EastAsia           | S_Iranian-2        | Iranian        | WestEurasia |
| B_Australian-4      | Australian      | Oceania            | S_Iraqi_Jew-2      | Iraqi_Jew      | WestEurasia |
| S_Hawaiian-1        | Hawaiian        | Oceania            | S_Jordanian-1      | Jordanian      | WestEurasia |
| S_Igorot-2          | Igorot          | Oceania            | S_Jordanian-2      | Jordanian      | WestEurasia |
| S_Maori-1           | Maori           | Oceania            | S_Jordanian-3      | Jordanian      | WestEurasia |
| B_Papuan-15         | Papuan          | Oceania            | S_Lezgin-2         | Lezgin         | WestEurasia |
| S_Papuan-10         | Papuan          | Oceania            | S_North_Ossetian-1 | North_Ossetian | WestEurasia |
| S_Papuan-11         | Papuan          | Oceania            | S_North_Ossetian-2 | North_Ossetian | WestEurasia |

**Table S3: Male samples included in the analysis (related to Figure 2)**
